# Supplementary material for: NH3 production from absorbed NO with synergistic catalysis of Pd/C and functionalized ionic liquids
Source: Royal Society of Chemistry journal article supplement (doi:10.1039/d3gc00769c), 2023-01-01
Supplement: d3gc00769c1.pdf [file d3gc00769c1.pdf]

## Support Information

### NH<sub>3</sub> production from absorbed NO with synergistic catalysis of Pd/C and functionalized ionic liquids

Yuanyuan Zhang<sup>a</sup>, Wanxiang Zhang<sup>a</sup>, Yan Wang<sup>a</sup>, Shuhang Ren<sup>a</sup>, Yucui Hou<sup>b</sup>, Weize Wu<sup>a,\*</sup>

<sup>a</sup> State Key Laboratory of Chemical Resource Engineering, Beijing University of Chemical Technology, Beijing, 100029, China

<sup>b</sup> College of Chemistry and Materials, Taiyuan Normal University, Shanxi, 030619, China

#### Characterization of the IL [TEPA][Im]

The chemical structures of tetraethylenepentamine (TEPA) and imidazole (Im) are shown in Fig. S1.

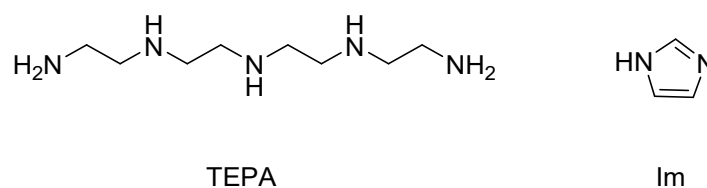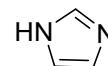

**Fig. S1** The chemical structures of tetraethylenepentamine (TEPA) and imidazole (Im).

The structure of the IL [TEPA][Im] was confirmed by <sup>1</sup>H NMR, shown in Fig. S2. The attribution of <sup>1</sup>H NMR (400 MHz, Chloroform-d) is shown as follows: δ 7.64 (s, 1H), 7.06 (s, 2H), 2.93 – 2.54 (m, 18H), 2.54 – 2.32 (m, 5H).

---

\* Corresponding author. E-mail: wzwu@mail.buct.edu.cn

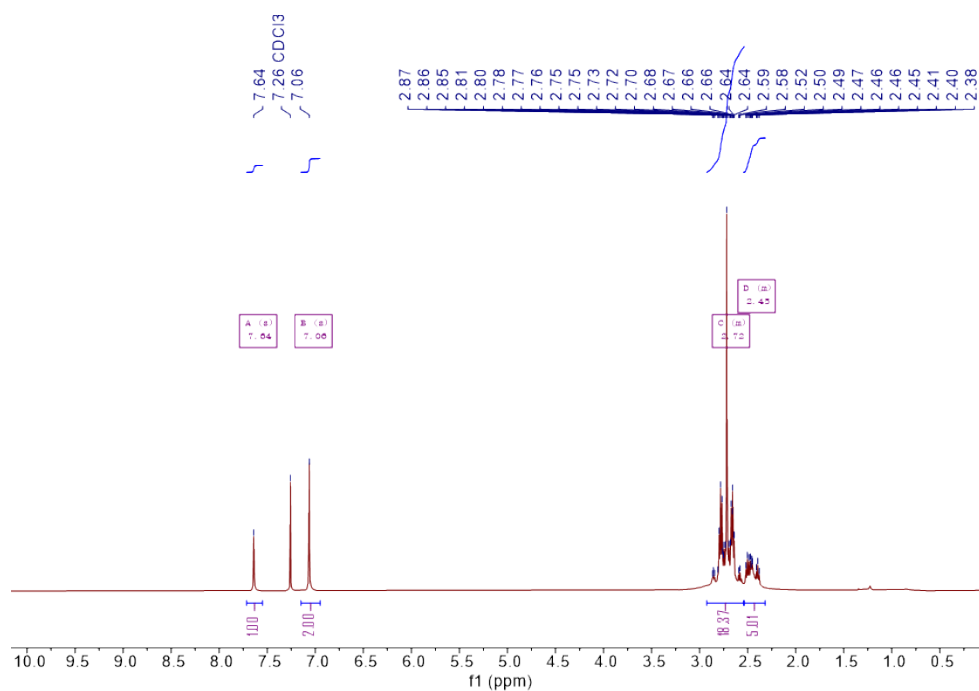

**Fig. S2**  $^1\text{H}$  NMR of [TEPA][Im] synthesized in this work.

The structure of the IL [TEPA][Im] was also confirmed by  $^{13}\text{C}$  NMR, shown in Fig. S3. The attribution of  $^{13}\text{C}$  NMR (101 MHz, DMSO- $d_6$ ) is shown as follows:  $\delta$  135.66, 122.15, 51.83, 48.59, 40.92.

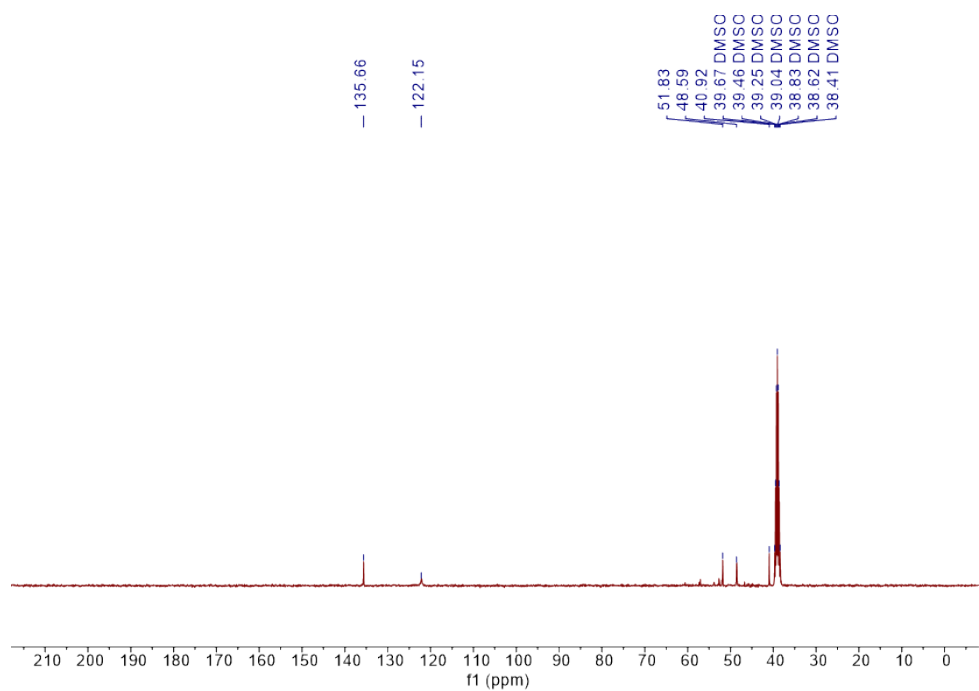

**Fig. S3**  $^{13}\text{C}$  NMR of [TEPA][Im] synthesized in this work.

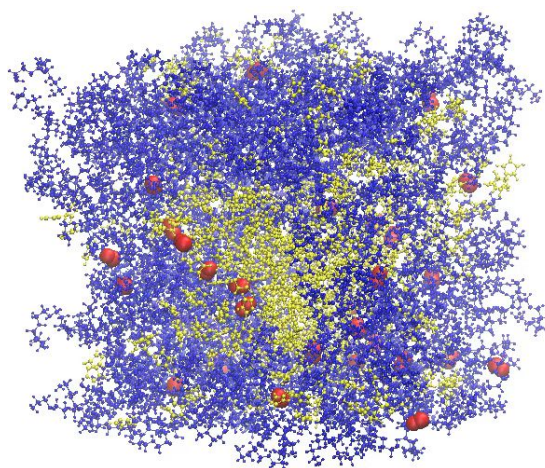

**Fig. S4** Snapshot of IL-NO structure at simulation 50 ns.

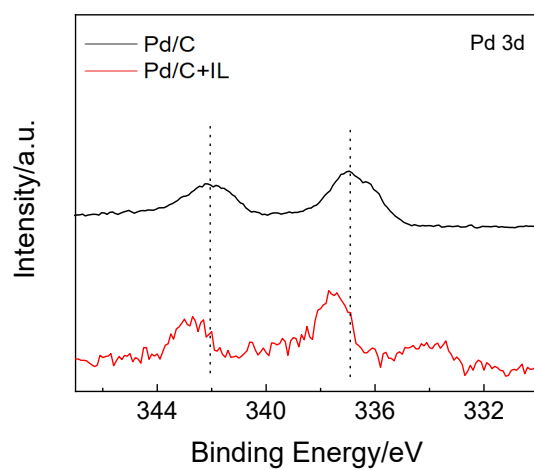

**Fig. S5** XPS spectra of Pd/C and Pd/C+IL.

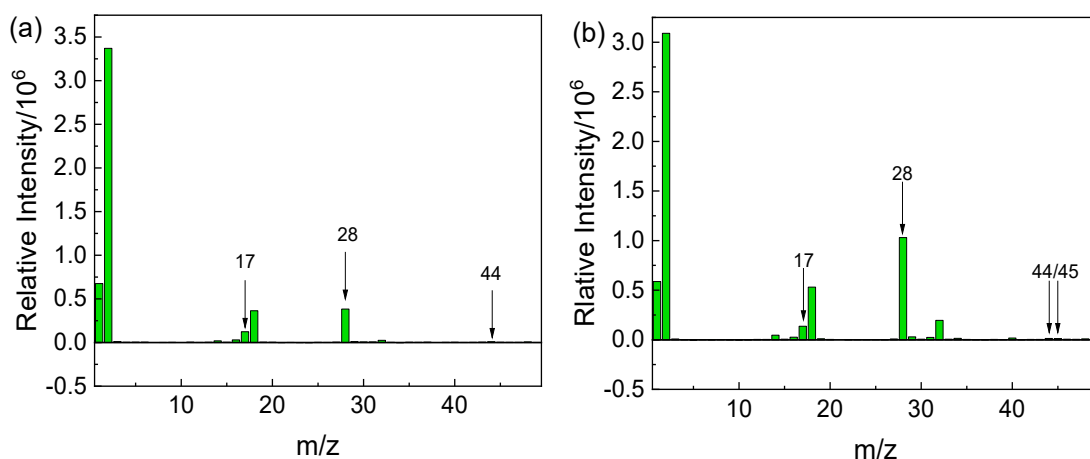

Mass spectrum (m/z): H<sub>2</sub>: 1, 2; NH<sub>3</sub>: 14, 15, 16, 17; N<sub>2</sub>: 14, 28, 29; N<sub>2</sub>O: 14, 15, 16, 28, 29, 30, 31, 44, 45.

**Fig. S6** Mass spectrometry analysis of reaction products: (a) NO, 0.5 mmol; (b) NO 1.5 mmol. Experimental conditions: [TEPA][Im], 2 g; Pd/C 10 mg; H<sub>2</sub> pressure, 6 MPa; reaction temperature, 100°C; rotational speed, 800 rpm; reaction time, 9 h.

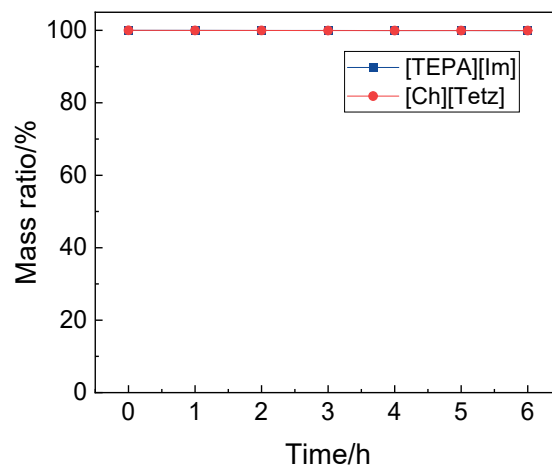

**Fig. S7** Thermal stability curve of ionic liquids at 100°C under N<sub>2</sub> (80 mL/min) purge.

**Table S1** The yields of N<sub>2</sub> and NH<sub>3</sub> and the conversion of NO under different catalyst dosages and NO contents

| Entry | Captured NO/mmol | Catalyst/mg | N <sub>2</sub> yield/% | NH <sub>3</sub> yield/% | NO conversion/% |
|-------|------------------|-------------|------------------------|-------------------------|-----------------|
| 1     | 0.5              | 5           | 12                     | 37                      | 100             |
| 2     | 0.5              | 30          | 34                     | 44                      | 100             |
| 3     | 1.5              | 20          | 18                     | 36                      | 100             |
| 4     | 1.5              | 30          | 57                     | 25                      | 100             |

Experimental conditions: [TEPA][Im], 2 g; H<sub>2</sub> pressure, 6 MPa; reaction temperature, 100°C; rotational speed, 800 rpm; reaction time, 9 h.
